# Supplementary material
Source: publisher figshare collection journal article supplement (https://future-science-group.figshare.com/ndownloader/files/35262085)
Supplement: Supplementary file 1 [file 35262085]

**Supplementary Materials**

**Table S1. Probability* of Death by Treatment Type**

| Outcome | rpFVIII Admissions (n=40) vs rFVIIa Admissions (n=180) | |
| --- | --- | --- |
| Unadjusted Results | |
|  | Probability | p-value |
| Death during most recent index admission | -12.5% | 0.075 |
| Death within 30 days post-discharge of most recent index admission | -20.1% | 0.012 |
| Death within 60 days post-discharge of most recent index admission | -18.6% | 0.039 |
| Death within 90 days post-discharge of most recent index admission | -20.2% | 0.025 |

NOTE: rFVIIa admissions served as the reference group.

*Calculated using multivariate regression

rFVIIa = activated recombinant Factor VII; rpFVIII = recombinant porcine FVIII

**Table S2. Descriptive Mortality at the Admission Level, Following Treatment**

| Outcomes | Total Admissions with Treatment  Treatments = 220 (rpFVIII = 40, rFVIIa = 180) | |
| --- | --- | --- |
| N = Deaths | % |
| Recorded death following an admission with treatment | 86 | 39.09% |
| Death during most recent admission with treatment* | 32 | 14.55% |
| Death within 30 days post discharge of latest admission with treatment | 47 | 21.36% |
| Death within 60 days post discharge of latest admission with treatment | 56 | 25.45% |
| Death within 90 days post discharge of latest admission with treatment | 58 | 26.36% |

**Bolded** numbers indicate percentages are higher in the rpFVIII group, otherwise percentage is higher for rFVIIa. In the table above, all death statistics occurred more frequently in the rFVIIa cohort.

*Indicates a case who died in the hospital during their most recent admission.

rFVIIa = activated recombinant Factor VII; rpFVIII = recombinant porcine FVIII

**Table S3. ICD 9/10 Codes for Comorbidities and Therapies of Interest**

| **Variables** | **ICD 9/10 Codes:** |
| --- | --- |
| Charlson Comorbidity Index: | |
| AIDS/HIV | ICD-10 Codes B20.x–B22.x, B24.x; ICD-9 Codes 042.x–044.x |
| Any malignancy, including lymphoma and leukemia, except malignant neoplasm of skin | ICD-10 Codes C00.x–C26.x, C30.x–C34.x, C37.x– C41.x, C43.x, C45.x–C58.x, C60.x– C76.x, C81.x–C85.x, C88.x, C90.x–C97.x; ICD-9 Codes 140.x–172.x, 174.x–195.8, 200.x–208.x, 238.6 |
| Cerebrovascular disease | ICD-10 Codes G45.x, G46.x, H34.0, I60.x–I69.x; ICD-9 Codes 362.34, 430.x–438.x |
| Chronic pulmonary disease | ICD-10 Codes I27.8, I27.9, J40.x–J47.x, J60.x–J67.x, J68.4, J70.1, J70.3; ICD-9 Codes 416.8, 416.9, 490.x–505.x, 506.4, 508.1, 508.8 |
| Congestive heart failure | ICD-10 Codes I09.9, I11.0, I13.0, I13.2, I25.5, I42.0, I42.5–I42.9, I43.x, I50.x, P29.0; ICD-9 Codes 398.91, 402.01, 402.11, 402.91, 404.01, 404.03, 404.11, 404.13, 404.91, 404.93, 425.4–425.9, 428.x |
| Dementia | ICD-10 Codes F00.x–F03.x, F05.1, G30.x, G31.1; ICD-9 Codes 290.x, 294.1, 331.2 |
| Diabetes with chronic complication | ICD-10 Codes E10.2–E10.5, E10.7, E11.2–E11.5, E11.7, E12.2–E12.5, E12.7, E13.2– E13.5, E13.7, E14.2–E14.5, E14.7; ICD-9 Codes 250.4–250.7 |
| Diabetes without chronic complication | ICD-10 Codes E10.0, E10.1, E10.6, E10.8, E10.9, E11.0, E11.1, E11.6, E11.8, E11.9, E12.0, E12.1, E12.6, E12.8, E12.9, E13.0, E13.1, E13.6, E13.8, E13.9, E14.0, E14.1, E14.6, E14.8, E14.9; ICD-9 Codes 250.0–250.3, 250.8, 250.9 |
| Hemiplegia or paraplegia | ICD-10 Codes G04.1, G11.4, G80.1, G80.2, G81.x, G82.x, G83.0–G83.4, G83.9; ICD-9 Codes 334.1, 342.x, 343.x, 344.0– 344.6, 344.9 |
| Metastatic solid tumor | ICD-10 Codes C77.x–C80.x; ICD-9 Codes 196.x–199.x |
| Mild liver disease | ICD-10 Codes B18.x, K70.0–K70.3, K70.9, K71.3–K71.5, K71.7, K73.x, K74.x, K76.0, K76.2–K76.4, K76.8, K76.9, Z94.4; ICD-9 Codes 070.22, 070.23, 070.32, 070.33, 070.44, 070.54, 070.6, 070.9, 570.x, 571.x, 573.3, 573.4, 573.8, 573.9, V42.7 |
| Moderate or severe liver disease | ICD-10 Codes I85.0, I85.9, I86.4, I98.2, K70.4, K71.1, K72.1, K72.9, K76.5, K76.6, K76.7; ICD-9 Codes 456.0–456.2, 572.2–572.8 |
| Myocardial infarction | ICD-10 Codes I21.x, I22.x, I25.2; ICD-9 Codes 410.x, 412.x |
| Peptic ulcer disease | ICD-10 Codes K25.x–K28.x; ICD-9 Codes 531.x–534.x |
| Peripheral vascular disease | ICD-10 Codes I70.x, I71.x, I73.1, I73.8, I73.9, I77.1, I79.0, I79.2, K55.1, K55.8, K55.9, Z95.8, Z95.9; ICD-9 Codes 093.0, 437.3, 440.x, 441.x, 443.1–443.9, 47.1, 557.1, 557.9, V43.4 |
| Renal disease | ICD-10 Codes I12.0, I13.1, N03.2–N03.7, N05.2– N05.7, N18.x, N19.x, N25.0, Z49.0– Z49.2, Z94.0, Z99.2; ICD-9 Codes 403.01, 403.11, 403.91, 404.02, 404.03, 404.12, 404.13, 404.92, 404.93, 582.x, 583.0–583.7, 585.x, 586.x, 588.0, V42.0, V45.1, V56.x |
| Rheumatic disease | ICD-10 Codes M05.x, M06.x, M31.5, M32.x–M34.x, M35.1, M35.3, M36.0; ICD-9 Codes 446.5, 710.0–710.4, 714.0– 714.2, 714.8, 725.x |
| Lymphoproliferative disorders | |
| Autoimmune Lymphoproliferative Syndrome | ICD-10 Codes D89.82, C83.50 – C83.59, C91.30 – C91.32, ICD-9 Codes 200.00 – 208.92, 279.41 |
| Hemophagocytic Lymphohistiocytosis | ICD-10 Codes D76.1; ICD-9 Codes 288.4. 277.89 |
| Langerhans Cell Histiocytosis | ICD-10 Codes J84.82; ICD-9 Codes 516.5 |
| Acute Lymphoblastic Leukemia (ALL) | ICD-10 Codes C91.00-C91.02, C92.60-C92.62, C92.A0-A2, C92.10–C92.12; ICD-9 Codes 204.00, 204.02 |
| Chronic Lymphocytic Leukemia (CLL) | ICD-10 Codes C91.10 – C91.12; ICD-9 Codes 204.10, 204.12 |
| T-Cell Lymphomas | ICD-10 Codes D82.0; ICD-9 Codes 279.13 |
| Hairy Cell Leukemia | ICD-10 Codes C82.50 – C82.69, C86.0, C82.0 – C82.49, C82.90 – C82.99, C91.40-C91.42, C82.80 – C82.89, C84.40 – C84.49, Z85.72; ICD-9 Codes 200.00 – 200.88, 202.00 – 202.28, 202.40 – 202.48, 202.70 – 202.98 |
| Follicular Lymphoma | ICD-10 Codes D89.82, C83.50 – C83.59, C91.30 – C91.32; ICD-9 Codes 200.00 – 208.92, 279.41 |
| Multiple Myeloma | ICD-10 Codes D76.1; ICD-9 Codes 288.4. 277.89 |
| Wiskott–Aldrich Syndrome | ICD-10 Codes C91.10 – C91.12; ICD-9 Codes 204.10, 204.12 |
| Non-Hodgkin’s lymphoma† | ICD-10 Codes M36.1, C90.00 – C90.02, C90.20 – C90.22, Z80.7*, Z85.79, C90.30 – C90.32; ICD-9 Codes 203.00-203.03, 238.6, 593.81, 593.82, 593.89, V16.7 |
| Autoimmune disorders | |
| Rheumatoid arthritis | ICD10 codes M05, M06; ICD9 codes 714.xx |
| Other connective tissue diseases | ICD10 codes M36; ICD9 codes 710.xx (except where otherwise specified) |
| Systemic lupus erythematosus | ICD10 codes M32; ICD9 codes 710.0 |
| Autoimmune thyroiditis | ICD10 codes E06.3; ICD9 codes 245.2 |
| Sicca (Sjögren) syndrome | ICD10 codes M35; ICD9 codes 710.2 |
| Antiphospholipid syndrome | ICD10 codes 68.61; ICD9 codes 289.81 |
| Diseases of the blood and blood-forming organs and certain disorders involving the immune mechanism | ICD10 codes D50-D89 |
| Certain disorders involving the immune mechanism | ICD10 codes D80-D89 |
| Other disorders involving the immune mechanism, not elsewhere classified | ICD10 codes D89 |

†Non-Hodgkin’s lymphoma includes: follicular lymphoma, hairy cell lymphoma, and T-cell lymphoma
